# Supplementary material
Source: PubMed Central journal article supplement (PMC7936350)
Supplement: pnas.2021795118.sapp.pdf [file pnas.2021795118.sapp.pdf]

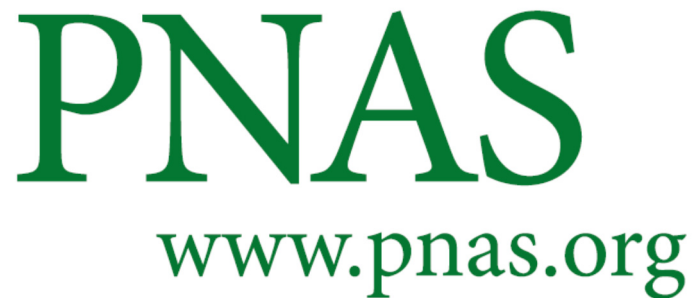

## Supplementary Information for

### Depletion of H3K36me2 recapitulates epigenomic and phenotypic changes induced by the H3.3K36M oncohistone mutation

Kartik N. Rajagopalan<sup>a,b,1,2</sup>, Xiao Chen<sup>c,1</sup>, Daniel N. Weinberg<sup>b,1</sup>, Haifen Chen<sup>d</sup>, Jacek Majewski<sup>d,\*</sup>, C. David Allis<sup>b,\*</sup> and Chao Lu<sup>c,\*</sup>

a. Division of Pulmonary, Allergy, and Critical Care Medicine, Department of Medicine, Columbia University Irving Medical Center, New York, NY 10032, USA

b. Laboratory of Chromatin Biology and Epigenetics, The Rockefeller University, New York, NY 10065, USA

c. Department of Genetics and Development and Herbert Irving Comprehensive Cancer Center, Columbia University Irving Medical Center, New York, NY 10032, USA

d. Department of Human Genetics, McGill University, Montreal, Quebec, Canada.

<sup>1</sup>These authors contributed equally to this work

<sup>2</sup> Present Address: Laboratory of Molecular Genetics, The Rockefeller University, New York, NY 10065, USA

\* Co-corresponding authors:

Jacek Majewski: [jacek.majewski@mcgill.ca](mailto:jacek.majewski@mcgill.ca)

Chao Lu: [cl3684@cumc.columbia.edu](mailto:cl3684@cumc.columbia.edu)

C. David Allis: [alliscd@rockefeller.edu](mailto:alliscd@rockefeller.edu)

**This PDF file includes:**

Figures S1 to S3  
Tables S1 to S3  
Legends for Datasets S1 to S2

**Other supplementary materials for this manuscript include the following:**

Datasets S1 to S2

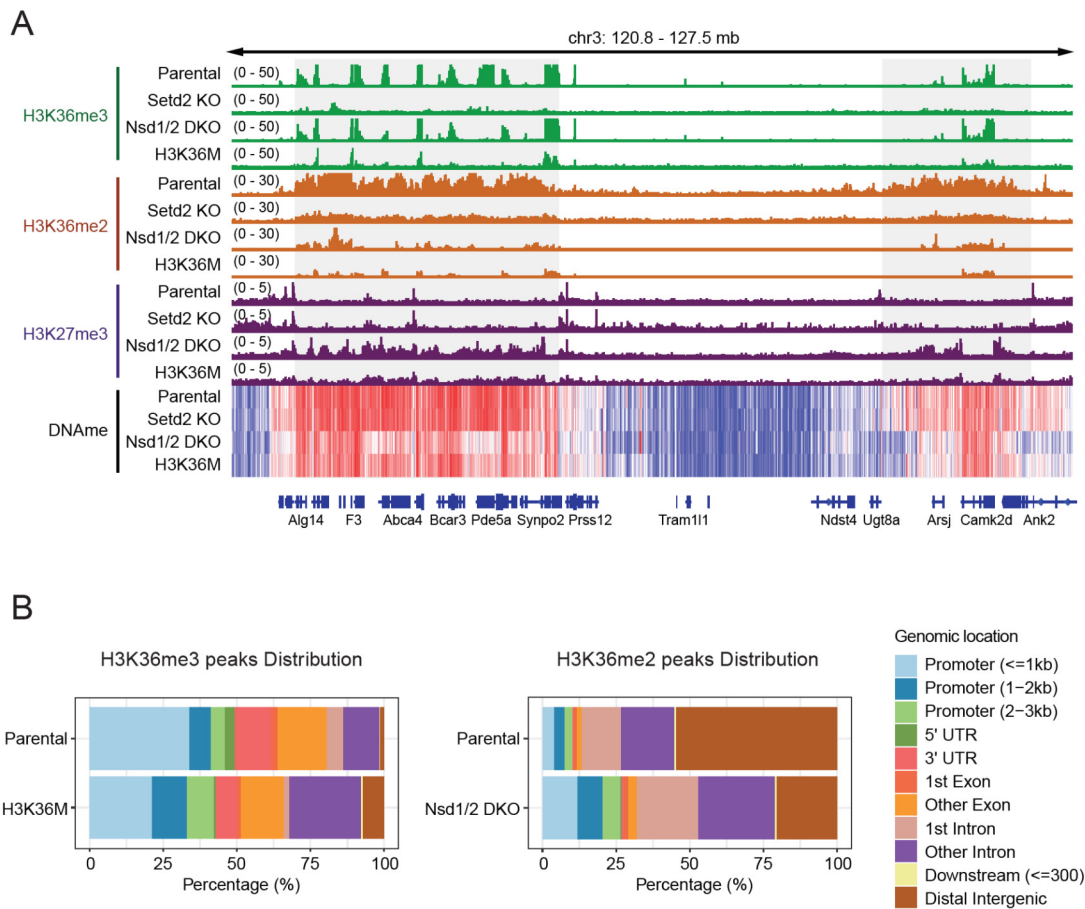

**Figure S1: related to Figure 1.**

(A) IGV snapshot showing the chromatin landscape of H3K36me3, H3K36me2, H3K27me3, and DNA methylation at a representative genomic region in parental, H3K36M, Nsd1/2 DKO and Setd2 KO 10T cells.

(B) Annotation of genomic distribution of (left) H3K36me3 peaks in Parental and H3K36M cells; (right) H3K36me2 peaks in Parental and Nsd1/2 DKO cells.

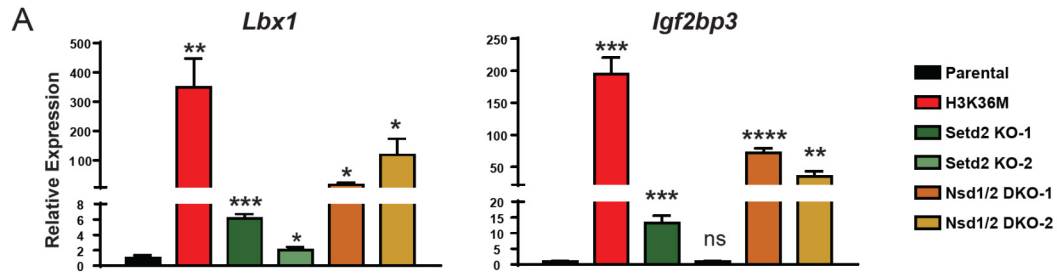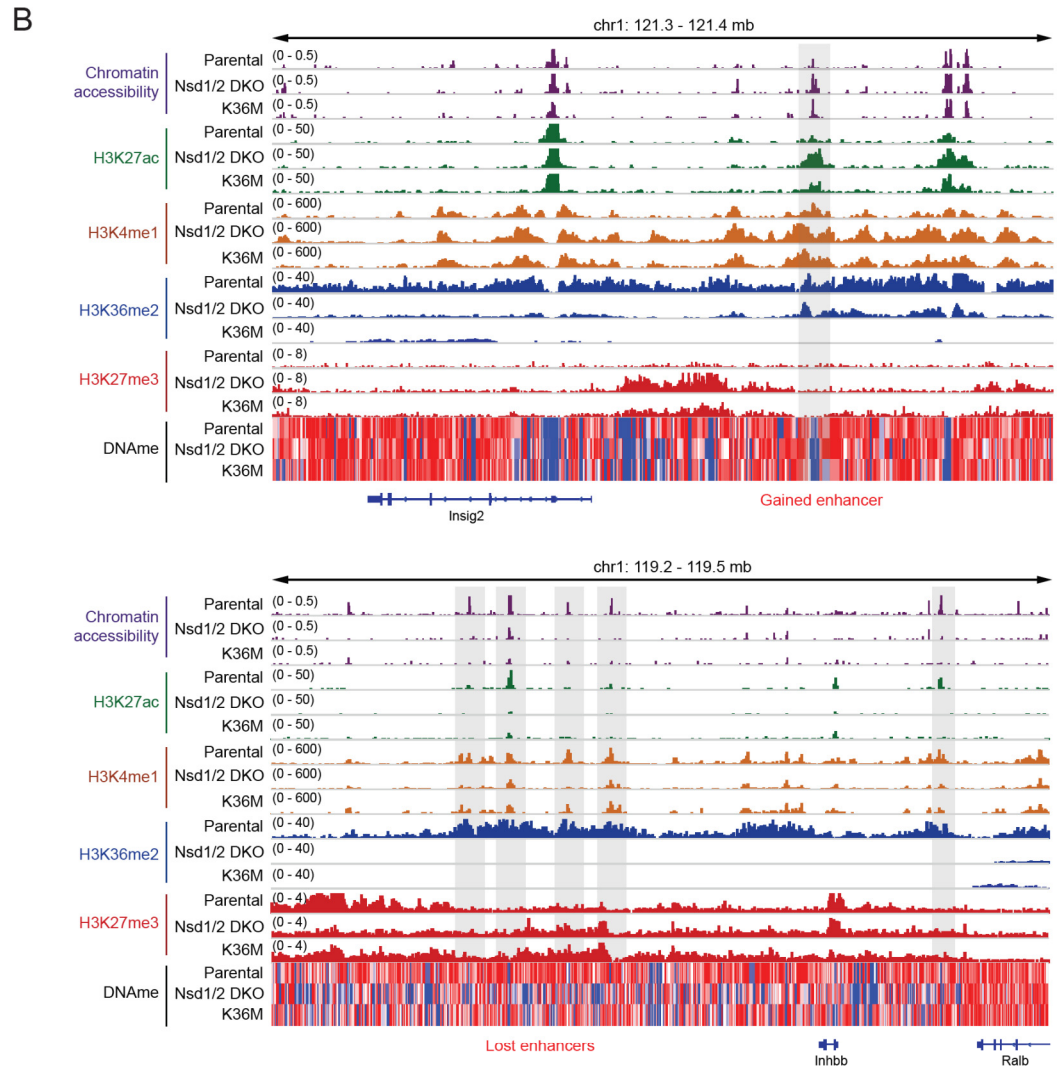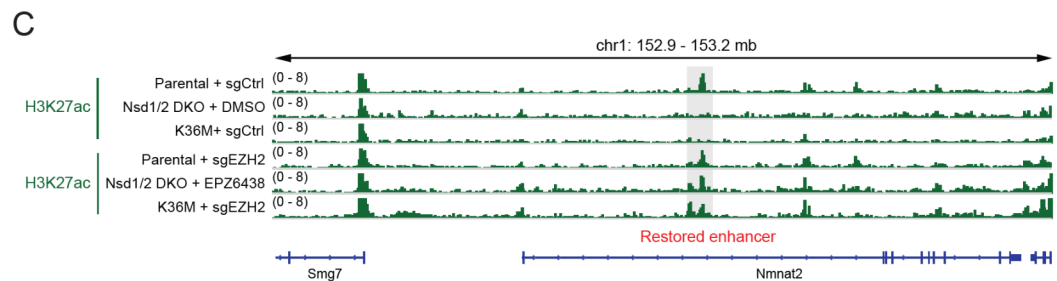

**Figure S2: related to Figure 3.**

(A) Expression of two representative PRC1-silenced genes *Lbx1* and *Igf2bp3* as measured by RT-PCR in parental, H3K36M, Nsd1/2 DKO and Setd2 KO 10T cells. Error bars represent standard deviation from n=3. T-test was performed to compare all samples to parental cells. \*,  $p < 0.05$ ; \*\*,  $p < 0.01$ ; \*\*\*,  $p < 0.005$ ; \*\*\*\*,  $p < 0.001$ ; ns, not significant.

(B) IGV snapshots showing the chromatin landscape of H3K36me2, H3K27ac, H3K27me3, H3K4me1, DNA methylation and ATAC-seq at representative genomic regions in parental, Nsd1/2 DKO and H3K36M cells. Enhancers that are gained or lost in Nsd1/2 DKO cells are indicated.

(C) IGV snapshots showing the chromatin landscape of H3K27ac at a representative genomic region in parental, Nsd1/2 DKO, and H3K36M cells with or without *Ezh2* knockout or EZH2 inhibitor EPZ-6438. An enhancer that is lost in Nsd1/2 DKO and H3K36M cells but restored upon *Ezh2* knockout or EPZ-6438 treatment is indicated.

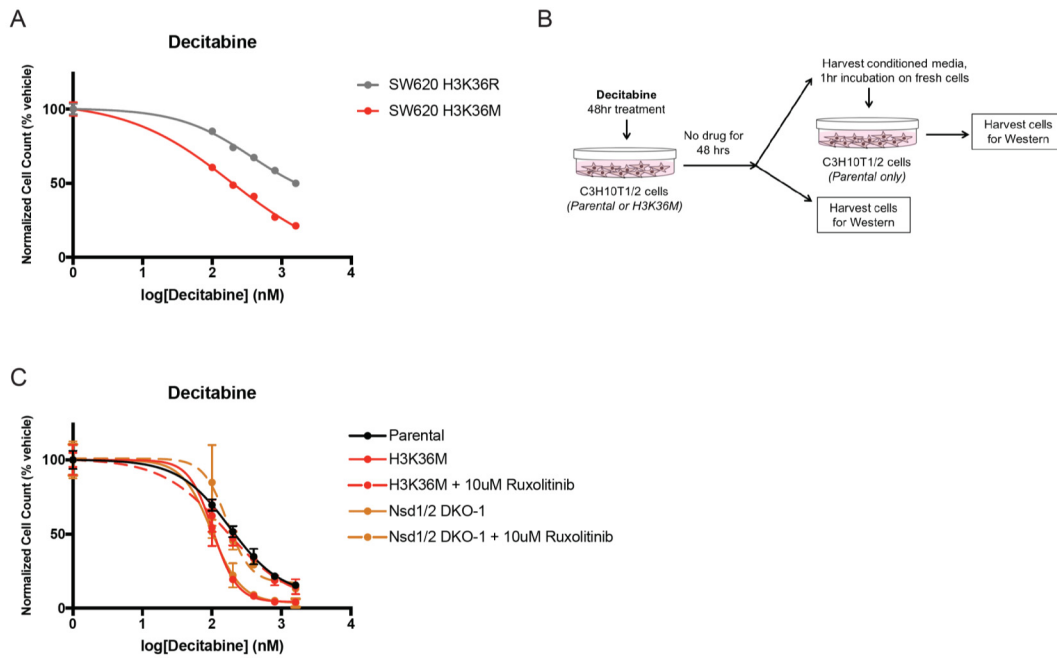

**Figure S3: related to Figure 4.**

(A) Normalized cell count of colorectal cancer cell line SW620 expressing H3.3K36M or H3.3K36R after treatment with increasing concentrations of decitabine. Two-way ANOVA was performed to compare all samples to parental cells and the  $p$ -values are listed in Table S2.  $n=3$ .

(B) Schematic for conditioned media treatment followed by Western blotting shown in Fig. 4E.

(C) Normalized cell count of parental, H3K36M and Nsd1/2 DKO cells after treatment with increasing concentrations of decitabine with or without the JAK1/2 inhibitor Ruxolitinib. Error bars represent standard deviation from  $n=3$ . Two-way ANOVA was performed to compare all samples to parental cells and the  $p$ -values are listed in Table S3.

| <b>Table S1: Drug Dose Responses in Parental, H3K36M, Setd2 KO-1, and Nsd1/2 DKO-1 Cells</b> |                   |                   |                       |
|----------------------------------------------------------------------------------------------|-------------------|-------------------|-----------------------|
|                                                                                              | <b>Decitabine</b> | <b>Cytarabine</b> | <b>Wee1 inhibitor</b> |
| <b>Dose 1 (0 nm)</b>                                                                         |                   |                   |                       |
| Parental vs. H3K36M                                                                          | ns                | ns                | ns                    |
| Parental vs. Setd KO-1                                                                       | ns                | ns                | ns                    |
| Parental vs. Nsd1/2 DKO-1                                                                    | ns                | ns                | ns                    |
| <b>Dose 2</b>                                                                                |                   |                   |                       |
| Parental vs. H3K36M                                                                          | ****              | **                | ****                  |
| Parental vs. Setd KO-1                                                                       | ****              | ****              | ****                  |
| Parental vs. Nsd1/2 DKO-1                                                                    | ****              | ns                | ***                   |
| <b>Dose 3</b>                                                                                |                   |                   |                       |
| Parental vs. H3K36M                                                                          | ****              | ns                | ns                    |
| Parental vs. Setd KO-1                                                                       | ****              | ****              | ****                  |
| Parental vs. Nsd1/2 DKO-1                                                                    | ****              | ns                | ****                  |
| <b>Dose 4</b>                                                                                |                   |                   |                       |
| Parental vs. H3K36M                                                                          | ****              | ns                | ***                   |
| Parental vs. Setd KO-1                                                                       | ***               | ****              | ****                  |
| Parental vs. Nsd1/2 DKO-1                                                                    | ****              | ns                | ****                  |
| <b>Dose 5</b>                                                                                |                   |                   |                       |
| Parental vs. H3K36M                                                                          | ****              | ns                | ***                   |
| Parental vs. Setd KO-1                                                                       | **                | ****              | ****                  |
| Parental vs. Nsd1/2 DKO-1                                                                    | ****              | ns                | ****                  |
| <b>Dose 6</b>                                                                                |                   |                   |                       |
| Parental vs. H3K36M                                                                          | ****              | ns                | ***                   |
| Parental vs. Setd KO-1                                                                       | *                 | ns                | ****                  |
| Parental vs. Nsd1/2 DKO-1                                                                    | ****              | ns                | *                     |
| <b>Dose 7</b>                                                                                |                   |                   |                       |
| Parental vs. H3K36M                                                                          | N/A               | N/A               | ****                  |
| Parental vs. Setd KO-1                                                                       | N/A               | N/A               | ns                    |
| Parental vs. Nsd1/2 DKO-1                                                                    | N/A               | N/A               | ns                    |
| <b>Dose 8</b>                                                                                |                   |                   |                       |
| Parental vs. H3K36M                                                                          | N/A               | N/A               | **                    |
| Parental vs. Setd KO-1                                                                       | N/A               | N/A               | ns                    |
| Parental vs. Nsd1/2 DKO-1                                                                    | N/A               | N/A               | ns                    |

**Table S1: related to Figure 4A-C.**

Two-way ANOVA was performed to compare all samples to the parental cells. \*,  $p < 0.05$ ; \*\*,  $p < 0.01$ ; \*\*\*,  $p < 0.005$ ; \*\*\*\*,  $p < 0.001$ .



| <b>Table S2: Decitabine Dose Response in SW620 H3K36R vs. SW620 H3K36M</b> |      |
|----------------------------------------------------------------------------|------|
| Dose 1 (0 nm)                                                              | ns   |
| Dose 2                                                                     | **** |
| Dose 3                                                                     | **** |
| Dose 4                                                                     | **** |
| Dose 5                                                                     | **** |
| Dose 6                                                                     | **** |

**Table S2: related to Figure S3A**

Two-way ANOVA was performed to compare all samples. \*,  $p < 0.05$ ; \*\*,  $p < 0.01$ ; \*\*\*,  $p < 0.005$ ; \*\*\*\*,  $p < 0.001$ .

| <b>Table S3: Decitabine Dose Response in Parental, H3K36M, and NSD1/2DKO-1 Cells with Ruxolitinib</b> |      |
|-------------------------------------------------------------------------------------------------------|------|
| <b>Dose 1 (0 nm)</b>                                                                                  |      |
| Parental vs. H3K36M                                                                                   | ns   |
| Parental vs. H3K36M + 10 uM Ruxolitinib                                                               | ns   |
| Parental vs. Nsd1/2 DKO-1                                                                             | ns   |
| Parental vs. Nsd1/2 DKO-1 + 10 uM Ruxolitinib                                                         | ns   |
| <b>Dose 2</b>                                                                                         |      |
| Parental vs. H3K36M                                                                                   | **** |
| Parental vs. H3K36M + 10 uM Ruxolitinib                                                               | *    |
| Parental vs. Nsd1/2 DKO-1                                                                             | **** |
| Parental vs. Nsd1/2 DKO-1 + 10 uM Ruxolitinib                                                         | **** |
| <b>Dose 3</b>                                                                                         |      |
| Parental vs. H3K36M                                                                                   | **** |
| Parental vs. H3K36M + 10 uM Ruxolitinib                                                               | ns   |
| Parental vs. Nsd1/2 DKO-1                                                                             | **** |
| Parental vs. Nsd1/2 DKO-1 + 10 uM Ruxolitinib                                                         | *    |
| <b>Dose 4</b>                                                                                         |      |
| Parental vs. H3K36M                                                                                   | **** |
| Parental vs. H3K36M + 10 uM Ruxolitinib                                                               | ns   |
| Parental vs. Nsd1/2 DKO-1                                                                             | **** |
| Parental vs. Nsd1/2 DKO-1 + 10 uM Ruxolitinib                                                         | ns   |
| <b>Dose 5</b>                                                                                         |      |
| Parental vs. H3K36M                                                                                   | **** |
| Parental vs. H3K36M + 10 uM Ruxolitinib                                                               | ns   |
| Parental vs. Nsd1/2 DKO-1                                                                             | **** |
| Parental vs. Nsd1/2 DKO-1 + 10 uM Ruxolitinib                                                         | ns   |
| <b>Dose 6</b>                                                                                         |      |
| Parental vs. H3K36M                                                                                   | **** |
| Parental vs. H3K36M + 10 uM Ruxolitinib                                                               | ns   |
| Parental vs. Nsd1/2 DKO-1                                                                             | **** |
| Parental vs. Nsd1/2 DKO-1 + 10 uM Ruxolitinib                                                         | ns   |

**Table S3: related to Figure S3C**

Two-way ANOVA was performed to compare all samples to the parental cells. \*,  $p < 0.05$ ; \*\*,  $p < 0.01$ ; \*\*\*,  $p < 0.005$ ; \*\*\*\*,  $p < 0.001$ .

**Dataset S1 (separate file).** Annotation of H3K36me3 peaks that remain in H3K36M 10T cells, related to Figure 1.

**Dataset S2 (separate file).** Lists of differentially expressed genes between H3K36M and Nsd1/2 DKO 10T cells and the most affected pathways, related to Figure 2. Thresholds for differentially expressed genes: fold change > 2, FDR < 0.1.
